# Supplementary material for: Orchestrating an immune response against cancer with engineered immune cells expressing αβTCRs, CARs, and innate immune receptors: an immunological and regulatory challenge
Source: Springer Nature journal article supplement (doi:10.1007/s00262-015-1710-8), 2015-05-19
Supplement: MOESM1 [file 8232984]

**Supplementary table 1, de Witte et al**

*Current and planned clinical trials with either  $\alpha\beta$  TCR or CAR based gene therapy studies, both in an autologous as well as in an allogeneic setting within the USA and EU. Search method: Open studies in USA and EU, excluding studies with unknown status. Queries: TCR, CAR, chimeric antigen receptor. Excluding non-oncology conditions and excluding non-TCR/CAR methods. Search date: December 1<sup>st</sup> 2014*

| Sponsor                                                  | Country | ID          | Phase | Type | Target        | Method                                                                      | Engineering       | Start date | Completion date | Condition                                | Enrollment |
|----------------------------------------------------------|---------|-------------|-------|------|---------------|-----------------------------------------------------------------------------|-------------------|------------|-----------------|------------------------------------------|------------|
| Jonsson Comprehensive Cancer Center                      | USA     | NCT00910650 | II    | TCR  | MART-1        | Autologous PBMCs + MART-1.26-35 peptide-pulsed dendritic cell (DC) vaccines | Retroviral vector | OCT09      | DEC16           | Metastatic Melanoma                      | 22         |
| Jonsson Comprehensive Cancer Center                      | USA     | NCT02070406 | I     | TCR  | NY-ESO-1      | Autologous T-cells + ipilimumab + NY-ESO-1157-165 peptide pulsed DC vaccine | Retroviral vector | MAR14      | FEB19           | Unspecified Adult Solid Tumor            | 12         |
| Jonsson Comprehensive Cancer Center                      | USA     | NCT01697527 | II    | TCR  | NY-ESO-1      | Autologous PBMCs + NY-ESO-1157-165 peptide pulsed DC vaccine                | Retroviral vector | NOV12      | OCT18           | Malignant Neoplasm                       | 22         |
| NCI                                                      | USA     | NCT02111850 | I/II  | TCR  | MAGE-A3       | Autologous CD4 <sup>+</sup> T-cells                                         | Retroviral vector | JAN14      | JAN17           | Metastatic Cancer                        | 107        |
| NCI                                                      | USA     | NCT02153905 | I/II  | TCR  | MAGE-A3       | Autologous T-cells                                                          | Retroviral vector | MAY14      | NOV18           | Metastatic Cancer<br>Metastatic Melanoma | 102        |
| NCI                                                      | USA     | NCT02062359 | II    | TCR  | NY-ESO-1      | CD62L+ lymphocytes                                                          | Retroviral vector | FEB14      | JUN19           | Metastatic Cancer<br>Metastatic Melanoma | 22         |
| Abramson Cancer Center of the University of Pennsylvania | USA     | NCT02030847 | II    | CAR  | CD19          | Autologous T-cells                                                          | Lentiviral vector | JAN14      | JUL15           | B Cell ALL                               | 24         |
| Adaptimmune                                              | USA     | NCT01350401 | I/II  | TCR  | NY-ESO-1/LAGE | Autologous T-cells                                                          | Lentiviral vector | MAY11      | FEB15           | Melanoma                                 | 6          |

**Supplementary table 1, de Witte et al**

| Sponsor                                                  | Country | ID          | Phase | Type      | Target             | Method                                                         | Engineering       | Start date | Completion date | Condition                                                   | Enrollment |
|----------------------------------------------------------|---------|-------------|-------|-----------|--------------------|----------------------------------------------------------------|-------------------|------------|-----------------|-------------------------------------------------------------|------------|
| Adaptimmune                                              | USA     | NCT01892293 | I/II  | TCR       | NY-ESO-1c259       | Autologous T-cells                                             | Unknown           | SEP13      | APR15           | MM                                                          | 10         |
| NCI                                                      | USA     | NCT01967823 | II    | mTCR      | NY-ESO-1           | Autologous PBMcs                                               | Retroviral vector | SEP13      | MAR15           | Metastatic Cancers Other Than Melanoma                      | 43         |
| Adaptimmune                                              | USA     | NCT01352286 | I/II  | TCR       | MAGE-A3/6 NY-ESO-1 | Autologous T-cells<br>Syngeneic T-cells                        | Unknown           | APR11      | APR14           | MM                                                          | 26         |
| Loyola University                                        | USA     | NCT01586403 | I     | TCR       | TIL 1383I          | Autologous T-cells                                             | Unknown           | JUL12      | SEP13           | Melanoma                                                    | 15         |
| Abramson Cancer Center of the University of Pennsylvania | USA     | NCT02135406 | I     | CAR       | CD19 scFv TCR ζ    | Autologous T-cells                                             | Lentiviral vector | MAY14      | MAY16           | MM                                                          | 15         |
| Fred Hutchinson Cancer Research Center                   | USA     | NCT01640301 | I/II  | TCR       | WT1                | Unknown                                                        | Unknown           | DEC12      | MAR17           | myelodysplastic syndrome<br>AML, CML                        | 55         |
| Abramson Cancer Center of the University of Pennsylvania | USA     | NCT01747486 | II    | CAR       | CD19               | Autologous T-cells                                             | Unknown           | DEC12      | DEC15           | chronic lymphocytic leukemia<br>small lymphocytic leukemia  | 32         |
| Memorial Sloan-Kettering Cancer Center                   | USA     | NCT01430390 | I     | CAR       | CD19               | Allogeneic Epstein-Barr Virus Specific Cytotoxic T-Lymphocytes | Unknown           | SEP11      | SEP15           | ALL                                                         | 26         |
| Abramson Cancer Center of the University of Pennsylvania | USA     | NCT02030834 | II    | CAR       | CD19               | Autologous T-cells                                             | Unknown           | JAN14      | JUL15           | Non-Hodgkin Lymphoma<br>Patients with CD19+B Cell Lymphomas | 55         |
| Abramson Cancer Center of the University of Pennsylvania | USA     | NCT01355965 | I     | CIR (CAR) | mesothelin         | Autologous T-cells                                             | Unknown           | MAY11      | MAY14           | Malignant Pleural Mesothelioma                              | 6          |

**Supplementary table 1, de Witte et al**

| Sponsor                                                  | Country | ID          | Phase | Type | Target        | Method                                   | Engineering       | Start date | Completion date | Condition                                                                      | Enrollment |
|----------------------------------------------------------|---------|-------------|-------|------|---------------|------------------------------------------|-------------------|------------|-----------------|--------------------------------------------------------------------------------|------------|
| Baylor College of Medicine                               | USA     | NCT01822652 | I     | CAR  | GD2           | Autologous T-cells                       | Retroviral vector | AUG13      | AUG15           | Neuroblastoma                                                                  | 14         |
| NCI                                                      | USA     | NCT02107963 | I     | CAR  | GD2           | Autologous T-cells                       | Retroviral vector | FEB14      | DEC16           | Sarcoma, Osteosarcoma, Rhabdomyosarcoma, Ewing Sarcoma, Melanoma               | 72         |
| Abramson Cancer Center of the University of Pennsylvania | USA     | NCT02209376 | I     | CAR  | EGFRvIII      | Autologous T-cells                       | Lentiviral vector | JUL14      | JUL16           | Glioma                                                                         | 12         |
| NCI                                                      | USA     | NCT01087294 | I     | CAR  | CD19          | Allogeneic T-cells                       | Retroviral vector | FEB10      | OCT15           | B-cell Leukemia<br>Hodgkin Lymphoma<br>Non-Hodgkin Lymphoma<br>B-Cell Lymphoma | 36         |
| Seattle Children's Hospital                              | USA     | NCT01683279 | I     | CAR  | CD19          | Autologous T-cells                       | Lentiviral vector | DEC12      | JAN15           | B Cell Leukemia                                                                | 18         |
| Baylor College of Medicine                               | USA     | NCT00902044 | I     | CAR  | HER2          | Autologous T-cells                       | Unknown           | JUL09      | JUL15           | Sarcoma                                                                        | 36         |
| Celdara Medical, LLC                                     | USA     | NCT02203825 | I     | CAR  | NKG2D-Ligands | Autologous T-cells                       | Unknown           | OCT14      | OCT15           | AML, MM<br>Advanced Myelodysplastic Syndrome                                   | 21         |
| Memorial Sloan-Kettering Cancer Center                   | USA     | NCT01840566 | I     | CAR  | CD19          | Autologous T-cells                       | Unknown           | APR13      | APR15           | Non-Hodgkin Lymphoma                                                           | 18         |
| Baylor College of Medicine                               | USA     | NCT02050347 | I     | CAR  | CD19          | Autologous T-cells<br>Allogeneic T-cells | Retroviral vector | APR14      | MAR18           | Non-Hodgkin's Lymphoma<br>B-Cell ALL<br>B-Cell CLL                             | 56         |
| Baylor College of Medicine                               | USA     | NCT01953900 | I     | CAR  | GD2           | Autologous VZV T-cells                   | Retroviral vector | APR14      | APR18           | Sarcoma                                                                        | 26         |
| Seattle Children's Hospital                              | USA     | NCT02028455 | I/II  | CAR  | CD19          | Autologous T-cells                       | Lentiviral vector | JAN14      | JAN17           | CD19+ Leukemia                                                                 | 80         |
| Baylor College of Medicine                               | USA     | NCT01109095 | I     | CAR  | HER2          | Autologous CMV T-cells                   | Unknown           | JAN14      | JAN17           | Glioblastoma Multiforme                                                        | 18         |

**Supplementary table 1, de Witte et al**

| Sponsor                                                  | Country | ID          | Phase | Type | Target               | Method                 | Engineering       | Start date | Completion date | Condition                                                                                                               | Enrollment |
|----------------------------------------------------------|---------|-------------|-------|------|----------------------|------------------------|-------------------|------------|-----------------|-------------------------------------------------------------------------------------------------------------------------|------------|
| Baylor College of Medicine                               | USA     | NCT00881920 | I     | CAR  | kappa immunoglobulin | Autologous T-cells     | Retroviral vector | JUL09      | JUL19           | Lymphoma<br>Myeloma<br>Leukemia                                                                                         | 54         |
| Baylor College of Medicine                               | USA     | NCT01316146 | I     | CAR  | CD30                 | Autologous T-cells     | Unknown           | DEC11      | DEC14           | Non-Hodgkin's Lymphoma<br>Hodgkin's Lymphoma                                                                            | 18         |
| NCI                                                      | USA     | NCT00924326 | I     | CAR  | CD19                 | Autologous T-cells     | Retroviral vector | FEB09      | JAN17           | Small Lymphocytic Lymphoma<br>Mantle Cell Lymphoma<br>Follicular Lymphoma<br>Large Cell Lymphoma<br>CLL                 | 40         |
| Abramson Cancer Center of the University of Pennsylvania | USA     | NCT02159716 | I     | CAR  | mesothelin           | Autologous T-cells     | Lentiviral vector | JUN14      | JUN16           | Metastatic Pancreatic (Ductal) Adenocarcinoma<br>Epithelial Ovarian Cancer<br>Malignant Epithelial Pleural Mesothelioma | 24         |
| NCI                                                      | USA     | NCT01454596 | I/II  | CAR  | EGFRvIII             | Autologous T-cells     | Retroviral vector | SEP11      | SEP19           | Malignant Glioma<br>Glioblastoma<br>Brain Cancer                                                                        | 160        |
| Fred Hutchinson Cancer Research Center                   | USA     | NCT01865617 | I/II  | CAR  | CD19                 | Autologous T-cells     | Lentiviral vector | MAY13      | APR29           | Leukemia<br>Lymphoma                                                                                                    | 54         |
| City of Hope Medical Center                              | USA     | NCT02159495 | I     | CAR  | CD123                | Autologous T-cells     | Lentiviral vector | OCT14      | OCT17           | Adult AML                                                                                                               | 24         |
| Baylor College of Medicine                               | USA     | NCT01853631 | I     | CAR  | CD19                 | Autologous T-cells     | Retroviral vector | FEB10      | FEB17           | Non-Hodgkin Lymphoma<br>CLL                                                                                             | 14         |
| Baylor College of Medicine                               | USA     | NCT00889954 | I     | CAR  | HER2                 | Autologous EBV T-cells | Retroviral vector | MAY09      | JUL15           | HER2 Positive Malignancies                                                                                              | 18         |
| NCI                                                      | USA     | NCT01593696 | I     | CAR  | CD19                 | Autologous T-cells     | Retroviral vector | APR12      | JAN20           | ALL<br>B Cell Lymphoma<br>Leukemia<br>Large Cell Lymphoma<br>Non-Hodgkin Lymphoma                                       | 48         |

**Supplementary table 1, de Witte et al**

| Sponsor                                | Country | ID          | Phase | Type | Target | Method                  | Engineering                    | Start date | Completion date | Condition                                                                                       | Enrollment |
|----------------------------------------|---------|-------------|-------|------|--------|-------------------------|--------------------------------|------------|-----------------|-------------------------------------------------------------------------------------------------|------------|
| Memorial Sloan-Kettering Cancer Center | USA     | NCT01860937 | I     | CAR  | CD19   | Autologous T-cells      | Unknown                        | MAY13      | MAY16           | Relapsed B-Cell ALL                                                                             | 24         |
| Children's Mercy Hospital Kansas City  | USA     | NCT01460901 | I     | CAR  | GD2    | Allogeneic T-cells      | Retroviral vector              | OCT11      | OCT13           | Neuroblastoma                                                                                   | 3          |
| Children's Hospital of Philadelphia    | USA     | NCT01626495 | I     | CAR  | CD19   | Autologous T-cells      | Lentiviral vector              | AUG11      | AUG16           | B Cell Leukemia<br>B Cell Lymphoma                                                              | 20         |
| NCI                                    | USA     | NCT02215967 | I     | CAR  | BCMA   | Autologous T-cells      | Unknown                        | AUG14      | APR18           | Myeloma, Plasma-Cell<br>Myeloma-Multiple                                                        | 38         |
| City of Hope Medical Center            | USA     | NCT02208362 | I     | CAR  | CD19   | Autologous T-cells      | Lentiviral vector              | DEC14      | DEC18           | Glioma                                                                                          | 44         |
| Memorial Sloan-Kettering Cancer Center | USA     | NCT01044069 | I     | CAR  | CD19   | Autologous T-cells      | Unknown                        | JAN10      | JAN15           | Leukemia<br>ALL                                                                                 | 40         |
| Memorial Sloan-Kettering Cancer Center | USA     | NCT00466531 | I/II  | CAR  | CD19   | Autologous T-cells      | Lentiviral & retroviral vector | MAR07      | DEC15           | Leukemia                                                                                        | 30         |
| Baylor College of Medicine             | USA     | NCT01192464 | I     | CAR  | CD30   | Autologous EBV+ T-cells | Retroviral vector              | MAR11      | OCT18           | Hodgkin's Lymphoma<br>Non-Hodgkin's Lymphoma                                                    | 18         |
| M.D. Anderson Cancer Center            | USA     | NCT02194374 | I     | CAR  | ROR1   | Autologous T-cells      | Unknown                        | DEC14      | DEC8            | Leukemia                                                                                        | 48         |
| Baylor College of Medicine             | USA     | NCT00586391 | I     | CAR  | CD19   | Autologous T-cells      | Retroviral vector              | FEB09      | FEB18           | B Cell Lymphoma<br>Chronic Lymphocytic Leukemia                                                 | 54         |
| City of Hope Medical Center            | USA     | NCT02051257 | I     | CAR  | CD19   | Autologous T-cells      | Lentiviral vector              | MAY14      | JUN21           | Leukemia<br>Lymphoma                                                                            | 24         |
| City of Hope Medical Center            | USA     | NCT02146924 | I     | CAR  | CD19   | Autologous T-cells      | Lentiviral vector              | JUL14      | JUL18           | B-cell Adult Acute Lymphoblastic<br>Leukemia<br>Recurrent Adult Acute Lymphoblastic<br>Leukemia | 24         |
| City of Hope Medical Center            | USA     | NCT02153580 | I     | CAR  | CD19   | Autologous T-cells      | Lentiviral vector              | SEP14      | SEP17           | Leukemia<br>Lymphoma                                                                            | 48         |

**Supplementary table 1, de Witte et al**

| Sponsor                                                  | Country | ID          | Phase | Type | Target     | Method                                       | Engineering       | Start date | Completion date | Condition                                                                                                      | Enrollment |
|----------------------------------------------------------|---------|-------------|-------|------|------------|----------------------------------------------|-------------------|------------|-----------------|----------------------------------------------------------------------------------------------------------------|------------|
| Abramson Cancer Center of the University of Pennsylvania | USA     | NCT01837602 | I     | CAR  | cMet       | Autologous T-cells                           | Unknown           | APR13      | APR17           | Metastatic Breast Cancer<br>Triple Negative Breast Cancer                                                      | 15         |
| National Cancer Institute (NCI)                          | USA     | NCT01218867 | I/II  | CAR  | VEGFR2     | Autologous CD8+ T-cells                      | Retroviral vector | OCT10      | OCT18           | Metastatic Cancer<br>Metastatic Melanoma<br>Renal Cancer<br>Colorectal Cancer<br>Ovarian Cancer<br>Lung Cancer | 118        |
| Baylor College of Medicine                               | USA     | NCT00840853 | I/II  | CAR  | CD19       | CMV, adenovirus, and EBV+ Autologous T-cells | Retroviral vector | APR09      | APR16           | ALL, CLL, Non-Hodgkin's Lymphoma                                                                               | 36         |
| National Cancer Institute (NCI)                          | USA     | NCT01583686 | I/II  | CAR  | mesothelin | Autologous T-cells                           | Retroviral vector | MAR12      | MAR19           | Metastatic Cancer<br>Pancreatic Cancer<br>Mesothelioma<br>Ovarian                                              | 136        |
| Abramson Cancer Center of the University of Pennsylvania | USA     | NCT01897415 | I     | CAR  | mesothelin | Autologous T-cells                           | Unknown           | JUL13      | JAN15           | Metastatic Pancreatic Ductal Adenocarcinoma                                                                    | 10         |
| Memorial Sloan-Kettering Cancer Center                   | USA     | NCT01140373 | I     | CAR  | PSMA       | Autologous T-cells                           | Unknown           | JUN10      | JUN15           | Prostate Cancer                                                                                                | 18         |
| University College, London                               | EU      | NCT01621724 | I/II  | TCR  | WT1        | Autologous T-cells                           | Retroviral vector | APR12      | APR16           | AML, CML                                                                                                       | 18         |
| Uppsala University                                       | EU      | NCT02132624 | I/II  | CAR  | CD19       | Autologous T-cells                           | Retroviral vector | APR14      | APR17           | B Cell Lymphoma<br>B Cell Leukemia                                                                             | 15         |
| University of Zurich                                     | EU      | NCT01722149 | I     | CAR  | FAP        | Autologous CD8+ T-cells                      | Retroviral vector | APR13      | OCT14           | Malignant Pleural Mesothelioma                                                                                 | 6          |
| King's College London                                    | EU      | NCT01818323 | I     | CAR  | ErbB1      | Autologous CD4+ T-cells                      | Unknown           | JUN13      | JUN15           | Head and Neck Cancer                                                                                           | 30         |

**Supplementary table 1, de Witte et al**

| Sponsor                    | Country | ID          | Phase | Type      | Target | Method             | Engineering       | Start date | Completion date | Condition            | Enrollment |
|----------------------------|---------|-------------|-------|-----------|--------|--------------------|-------------------|------------|-----------------|----------------------|------------|
| Professor Robert Hawkins   | EU      | NCT01493453 | I     | CIR (CAR) | CD19   | Autologous T-cells | Retroviral vector | MAR08      | MAY14           | Non-Hodgkin Lymphoma | 24         |
| University College, London | EU      | NCT01195480 | I/II  | CAR       | CD19   | Autologous T-cells | Retroviral vector | MAY12      | DEC14           | ALL                  | 30         |
